# Supplementary material for: Monomer, dimer or cyclic helicate? Coordination diversity with hard–soft P,N-donor ligands
Source: Royal Society of Chemistry journal article supplement (doi:10.1039/c3dt32560a), 2013-01-01
Supplement: c3dt32560a.pdf [file c3dt32560a.pdf]

Supplementary data to accompany:

## Monomer, dimer or cyclic helicate? Coordination diversity with hard-soft *P,N*-donor ligands?

Edwin C. Constable,\* Nik Hostettler, Catherine E. Housecroft,\* Niamh Murray, Jonas Schönle, Umut Soydaner, Roché M. Walliser and Jennifer A. Zampese

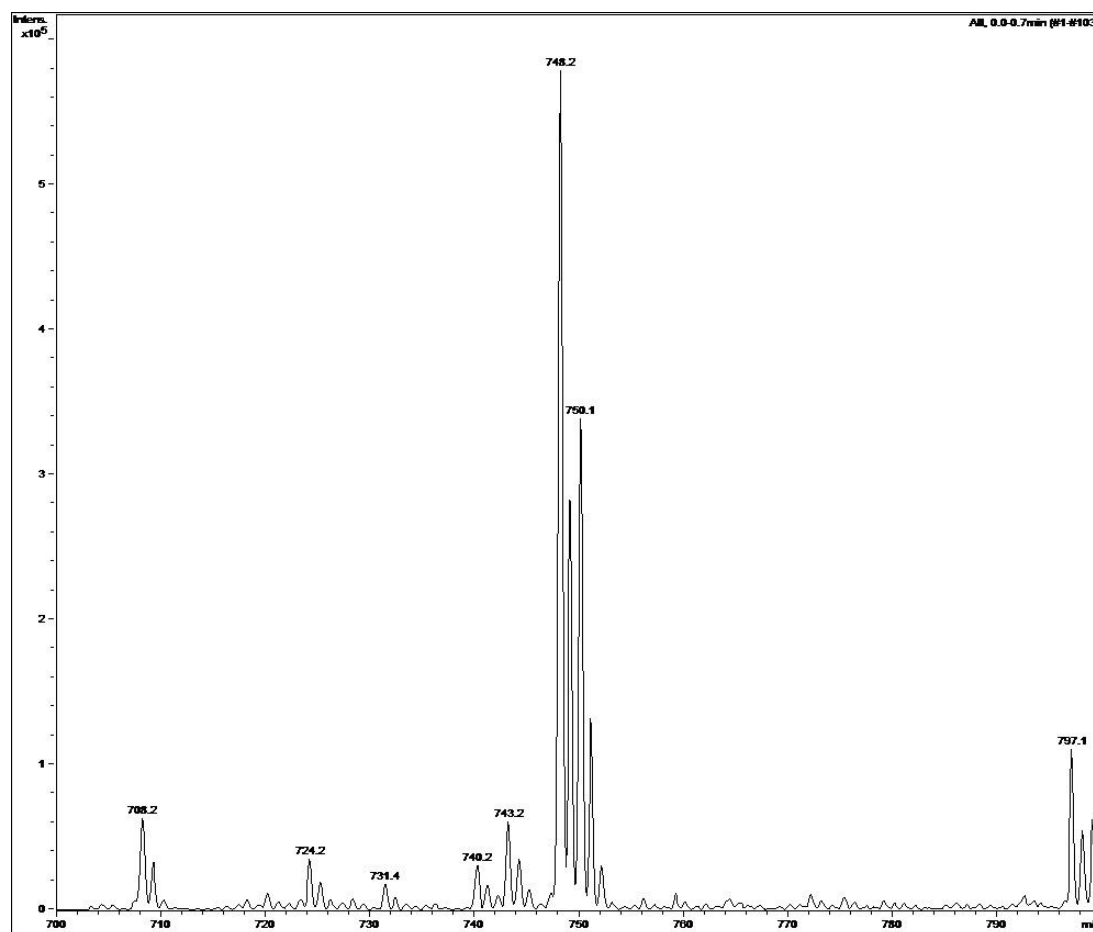

Figure S1a. ESI MS of an MeOH solution of  $[\text{Cu}(\mathbf{1})][\text{PF}_6]$  showing  $m/z$  748.2 assigned to  $[\text{Cu}(\mathbf{1})]^+$ . The peak envelope at  $m/z$  797.1 is assigned to  $[\text{Cu}(\mathbf{1})(\text{MeOH})(\text{OH})]^+$ , oxidation occurring in the mass spectrometer.

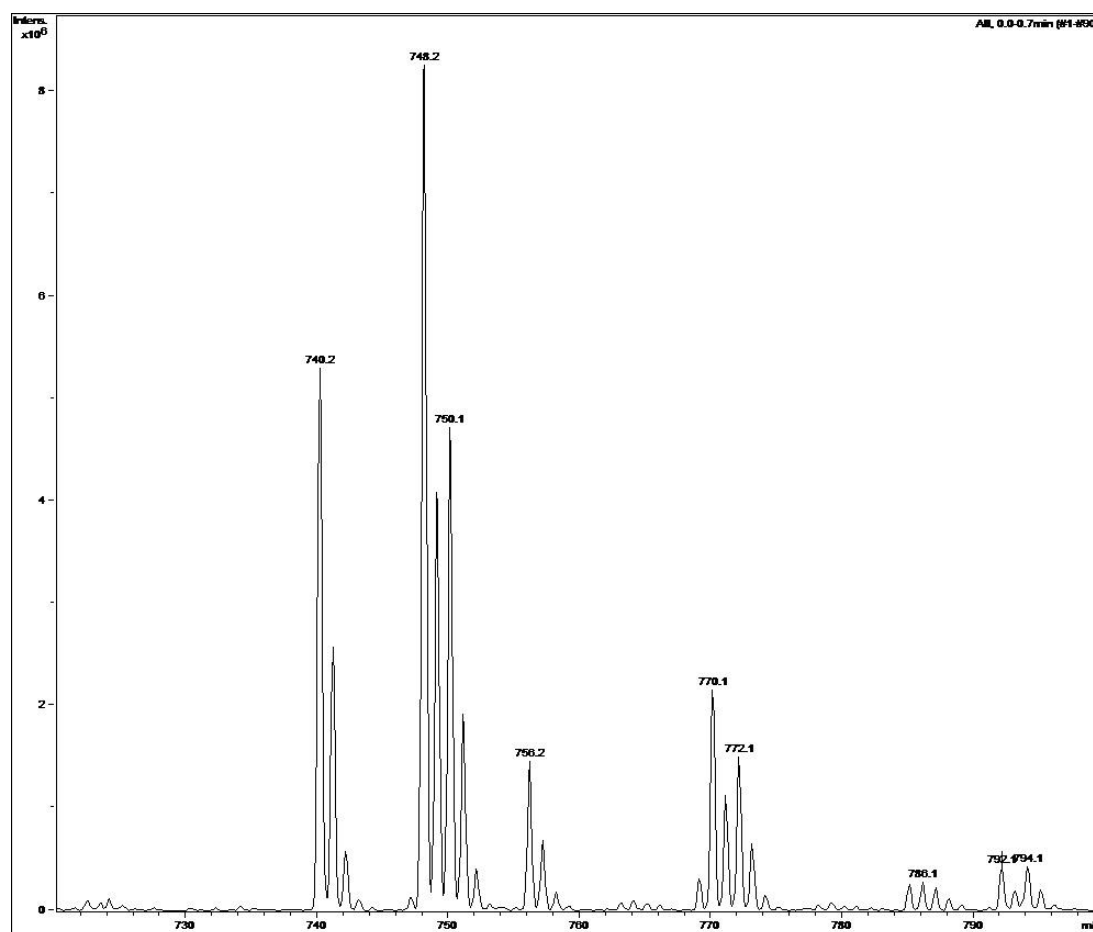

Fig. 1b ESI MS of a solution of [Cu(**1**)]PF<sub>6</sub> in a 1 : 1 mixture of MeOH and CH<sub>2</sub>Cl<sub>2</sub>; peak assignments:  $m/z$  740.2 [**1** + 2O + Na]<sup>+</sup>, 756.2 [**1** + 2O + K]<sup>+</sup>, 748.2 [Cu(**1**)]<sup>+</sup>, 770.1 [Cu(**1**) - H + Na]<sup>+</sup>. The peak at  $m/z$  792.1 is tentatively assigned to [Cu(**1**) - 2H + 2Na]<sup>+</sup>.

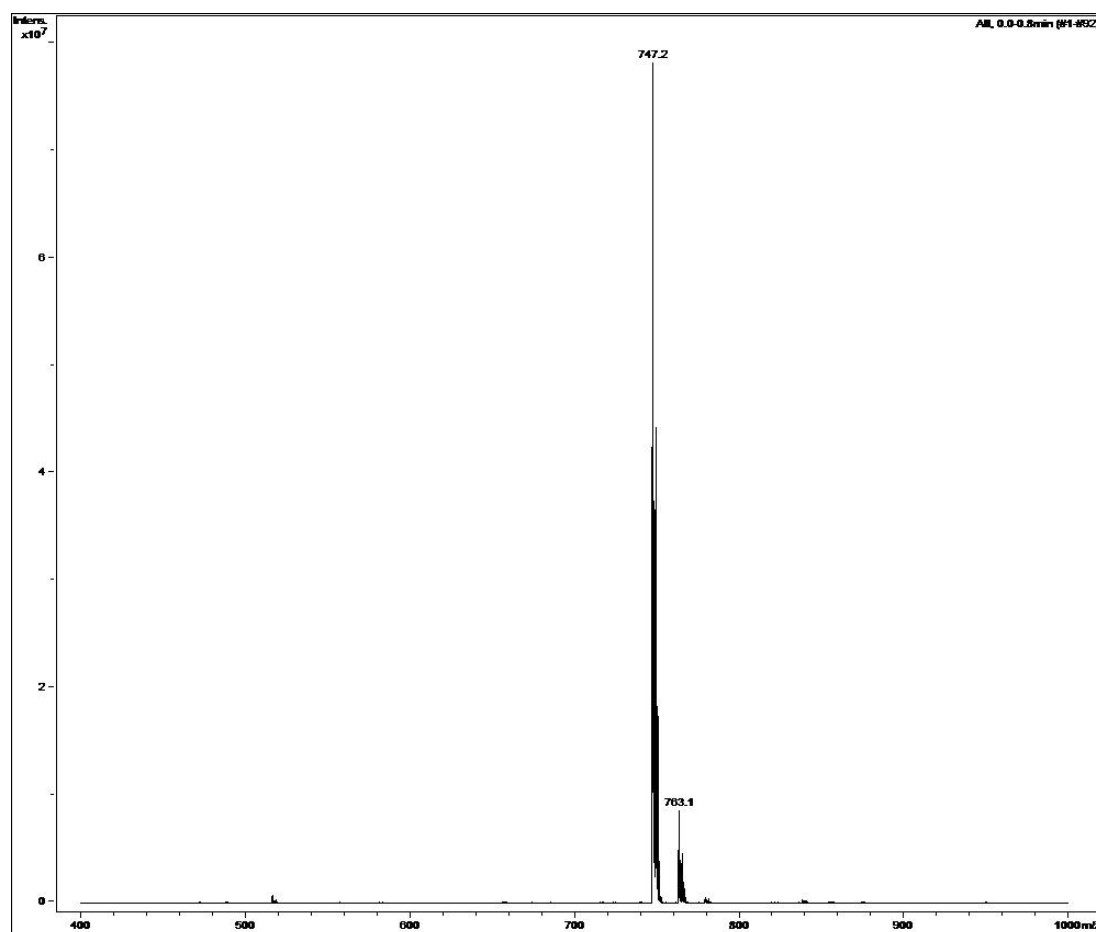

Figure S2. ESI MS of an MeCN solution of  $[\text{Cu}(\mathbf{2})][\text{PF}_6]$ :  $m/z$  747.2 corresponds to  $[\text{Cu}(\mathbf{2})]^+$  and  $m/z$  763.1 to  $[\text{Cu}(\mathbf{2} + \text{O})]^+$ .

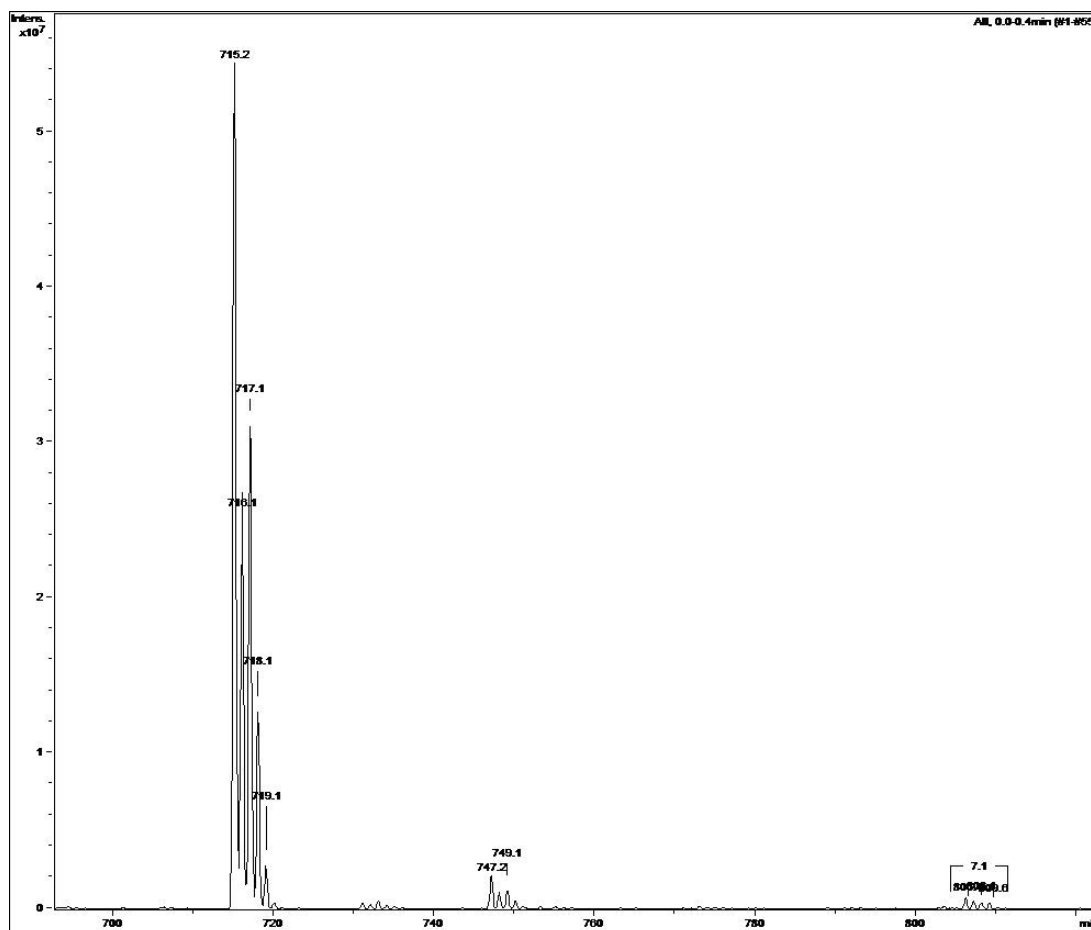

Figure S3 ESI MS of a MeOH solution of  $[\text{Cu}(\mathbf{3})][\text{PF}_6]$ :  $m/z$  715.2 corresponds to  $[\text{Cu}(\mathbf{3})]^+$ .

### Crystallographic data for $2\{[\text{Cu}_2(\mathbf{3})_2][\text{PF}_6]_2\} \cdot \text{C}_5\text{H}_{12} \cdot 5\text{H}_2\text{O}$

$\text{C}_{181}\text{H}_{158}\text{Cu}_4\text{F}_{24}\text{N}_8\text{O}_5\text{P}_{12}$ ,  $M = 3607.02$ , yellow block, monoclinic, space group  $P2_1/c$ ,  $a = 12.9676(14)$ ,  $b = 47.180(5)$ ,  $c = 18.0286(15)$  Å,  $\beta = 128.169(5)^\circ$ ,  $U = 8671.8(15)$  Å<sup>3</sup>,  $Z = 2$ ,  $D_c = 1.378$  Mg m<sup>-3</sup>,  $\mu(\text{Mo-K}\alpha) = 0.677$  mm<sup>-1</sup>,  $T = 123$  K. Total 70538 reflections, 19083 unique,  $R_{\text{int}} = 0.0600$ . Refinement of 12947 reflections (1119 parameters) with  $I > 2\sigma(I)$  converged at final  $R1 = 0.0831$  ( $R1$  all data = 0.1296),  $wR2 = 0.2258$  ( $wR2$  all data = 0.2623),  $\text{gof} = 1.160$ . CCDC 907594.

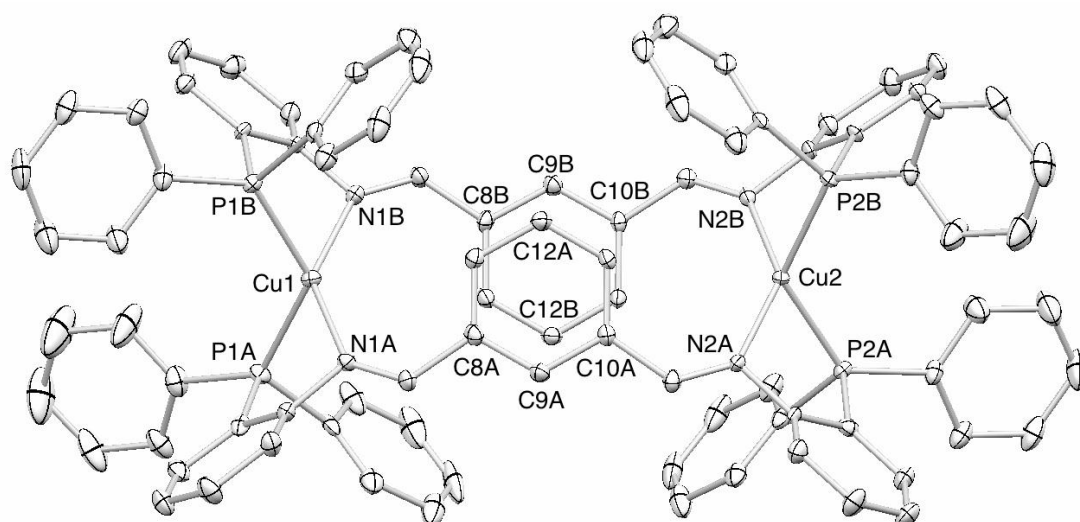

Fig. S4 The structure of the  $[\text{Cu}_2(\mathbf{3})_2]^{2+}$  cation in  $2\{[\text{Cu}_2(\mathbf{3})_2][\text{PF}_6]_2\} \cdot \text{C}_5\text{H}_{12} \cdot 5\text{H}_2\text{O}$  (ellipsoids plotted at 40% probability level and H atoms omitted). Selected bond parameters: Cu1-N1A = 2.119(3), Cu1-N1B = 2.120(4), Cu1-P1A = 2.2441(9), Cu1-P1B = 2.2442(9), Cu2-N2A = 2.089(3), Cu2-N2B = 2.138(3), Cu2-P2B = 2.2332(9), Cu2-P2A = 2.2531(9) Å; N1A-Cu1-N1B = 140.15(12), N1A-Cu1-P1A = 83.36(8), N1B-Cu1-P1A = 114.38(9), N1A-Cu1-P1B = 115.00(8), N1B-Cu1-P1B = 83.28(8), P1A-Cu1-P1B = 127.51(4), N2A-Cu2-N2B = 140.74(12), N2A-Cu2-P2B = 119.53(9), N2B-Cu2-P2B = 81.96(8), N2A-Cu2-P2A = 83.69(8), N2B-Cu2-P2A = 110.29(8), P2B-Cu2-P2A = 127.07(4) .
